# Supplementary material for: IL-15 reprogramming compensates for NK cell mitochondrial dysfunction in HIV-1 infection
Source: PubMed Central journal article supplement (PMC11143930; doi:10.1172/jci.insight.173099), 2024-02-22
Supplement: jciinsight-9-173099-s078.pdf [file jciinsight-9-173099-s078.pdf]

1 **IL-15 re-programming compensates for NK cell mitochondrial dysfunction in HIV-1 infection**

2 Elia Moreno-Cubero<sup>1,9</sup>, Aljawharah Alrubayyi<sup>1,9</sup>, Stefan Balint<sup>2</sup>, Ane Ogbe<sup>1</sup>, Upkar S Gill<sup>3</sup>, Rebecca  
3 Matthews<sup>4</sup>, Sabine Kinloch<sup>5</sup>, Fiona Burns<sup>4,5</sup>, Sarah Rowland-Jones<sup>1</sup>, Persephone Borrow<sup>1</sup>, Anna  
4 Schurich<sup>6</sup>, Michael Dustin<sup>2</sup>, Dimitra Peppas<sup>5,7, 8\*</sup>

5

6 **Supplementary material:**

7

8 **Supplementary figure 1.** SCENITH metabolic analysis of canonical and adaptive NK cells.

9 **Supplementary figure 2.** NK cell frequencies after oligomycin treatment.

10 **Supplementary figure 3.** Evaluation of NK cell mitochondrial health.

11 **Supplementary figure 4.** Quantification of gene expression by RT-qPCR.

12 **Supplementary figure 5.** Analysis of NK cell membrane health after IL-15 treatment.

13

14 **Supplementary movie 1.** Representative confocal z-stack, 3D projection and reconstruction of  
15 mitochondrial distribution in a primary human NK cell isolated from a HCMV+ control.

16 **Supplementary movie 2.** Representative confocal z-stack, 3D projection and reconstruction of  
17 mitochondrial distribution in a primary human NK cell isolated from an HIV-1 positive donor.

18

19

20

21

22

23

24

25

26

27

28 **Supplementary figure 1. SCENITH metabolic analysis of canonical and adaptive NK cells.**

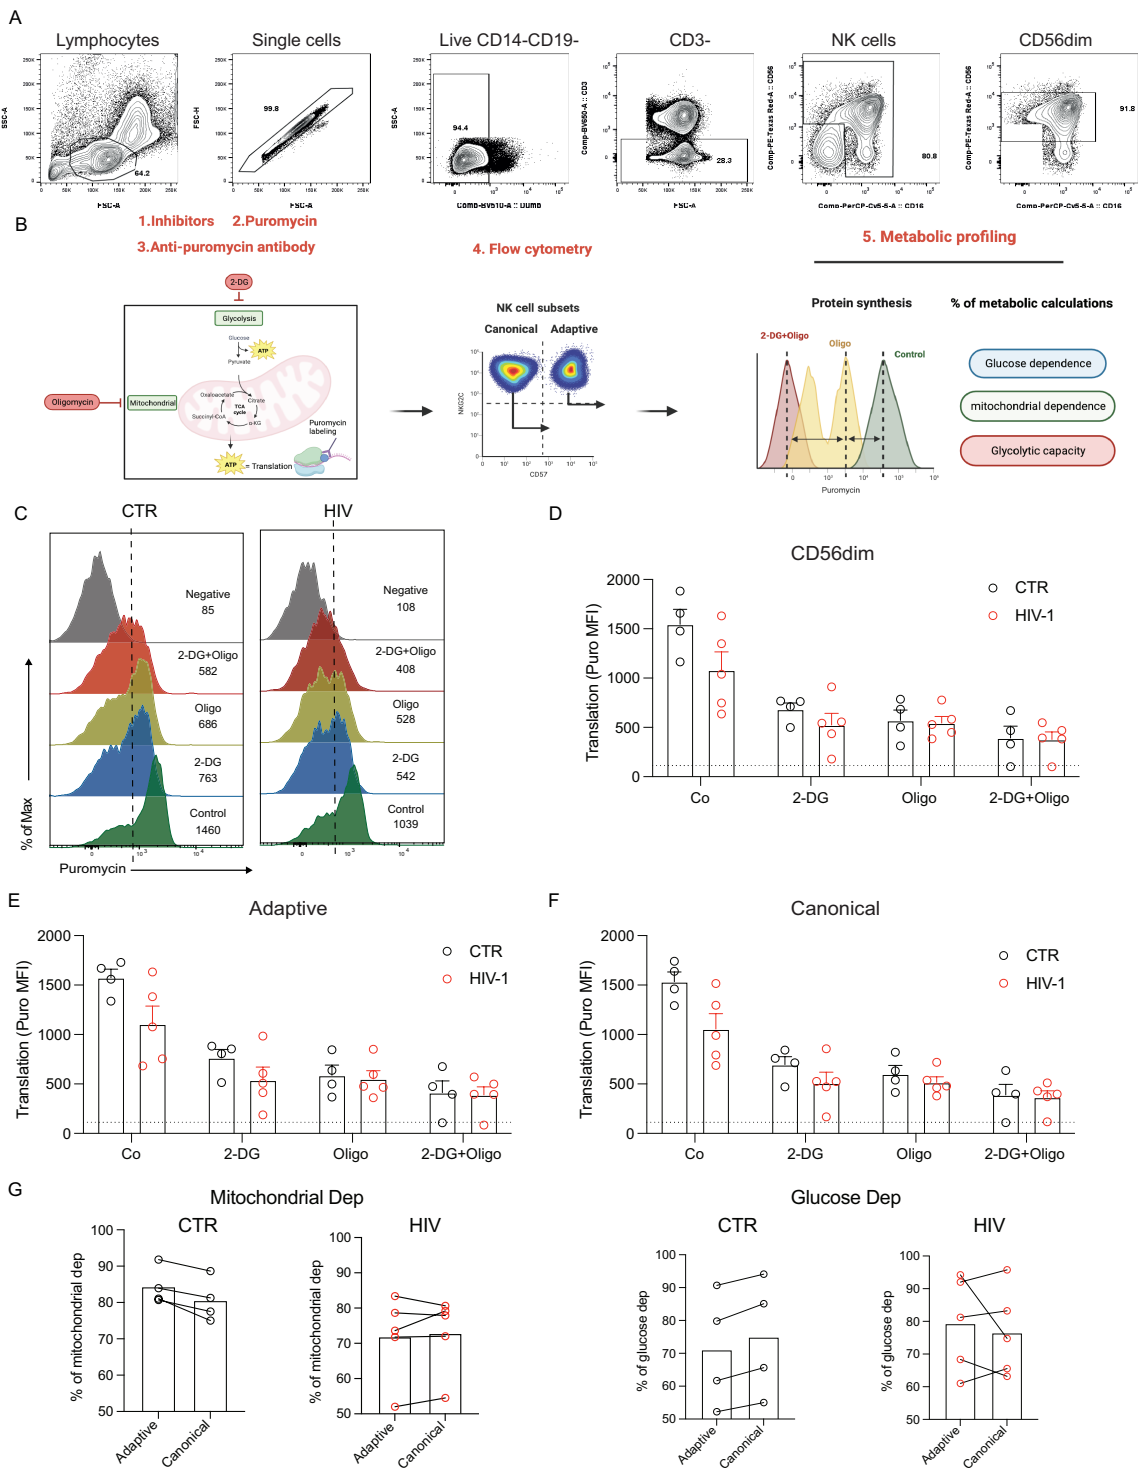

29  
 30 **(A)** Representative example of flow cytometry plots from a HIV-1 positive subject showing gating on  
 31 live CD3-, CD14-, CD19- lymphocytes; CD56 and CD16 NK cells. **(B)** Conceptual overview of *ex vivo*  
 32 SCENITH metabolic profiling of different NK cell subpopulations. **(C)** Representative histogram plots  
 33 showing levels of puromycin measured by SCENITH in the presence or absence of different inhibitors  
 34 in NK cells from healthy controls (CTR n=4) and HIV-1 positive donors (HIV-1; n=5). **(D)** Translation  
 35 levels at basal and after Oligomycin or 2-DG treatments in CD56dim, **(E)** adaptive, and **(F)** canonical  
 36 NK cell subsets. Dotted black line represents the background level obtained after negative control  
 37 treatment. **(G)** Dependency of adaptive and canonical NK cells on mitochondrial or glucose oxidation  
 38 in HIV-1 negative and HIV-1 positive donors.

39 **Supplementary figure 2. NK cell frequencies after the oligomycin treatment.**  
 40

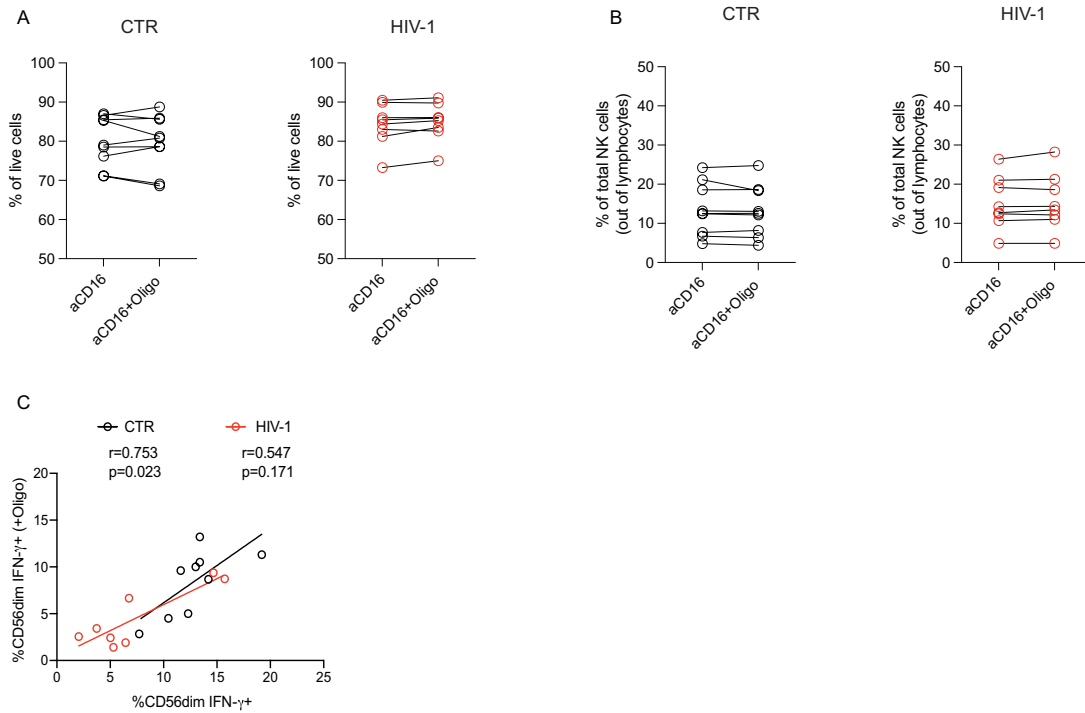

41  
 42  
 43 **(A)** Percentage of live cells and **(B)** total NK cells (out of lymphocytes) before and after the addition of  
 44 oligomycin. **(C)** Correlation between the percentage of CD56dim IFN- $\gamma$ + cells after CD16 stimulation in  
 45 the presence or absence of oligomycin.  
 46  
 47  
 48  
 49  
 50  
 51  
 52  
 53  
 54  
 55  
 56  
 57  
 58  
 59  
 60  
 61  
 62  
 63  
 64  
 65  
 66  
 67  
 68  
 69  
 70

71  
72  
73

**Supplementary figure 3. Evaluation of NK cell mitochondrial health.**

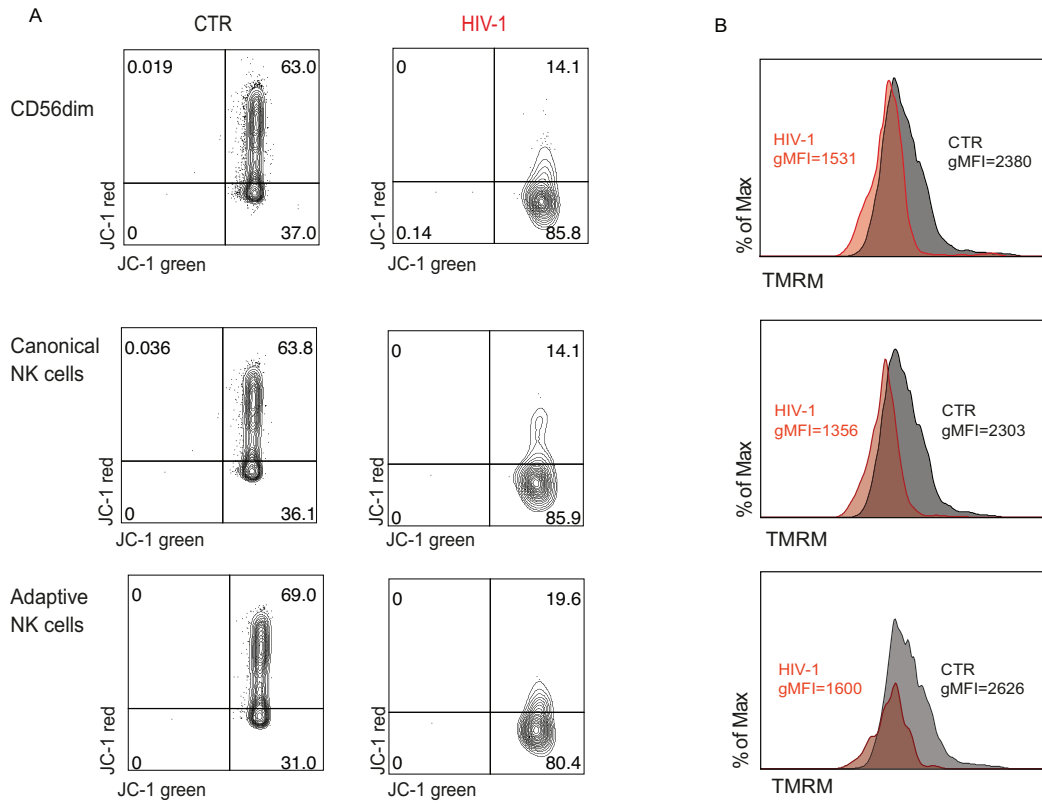

74  
75  
76  
77  
78  
79  
80  
81  
82  
83  
84  
85  
86  
87  
88  
89  
90  
91  
92  
93  
94  
95  
96  
97  
98  
99

**(A)** Representative flow plots depicting the ratio of polarised over depolarised mitochondrial of total CD56dim NK cells and NK cell subsets by JC-1 staining in a control (CTR) and HIV-1 positive donor (HIV-1). **(B)** Representative histograms of TMRM gMFI in CD56dim NK cells and NK cell subsets in the same HIV-negative and -positive donors.

100 **Supplementary figure 4. Quantification of gene expression by RT-qPCR.**

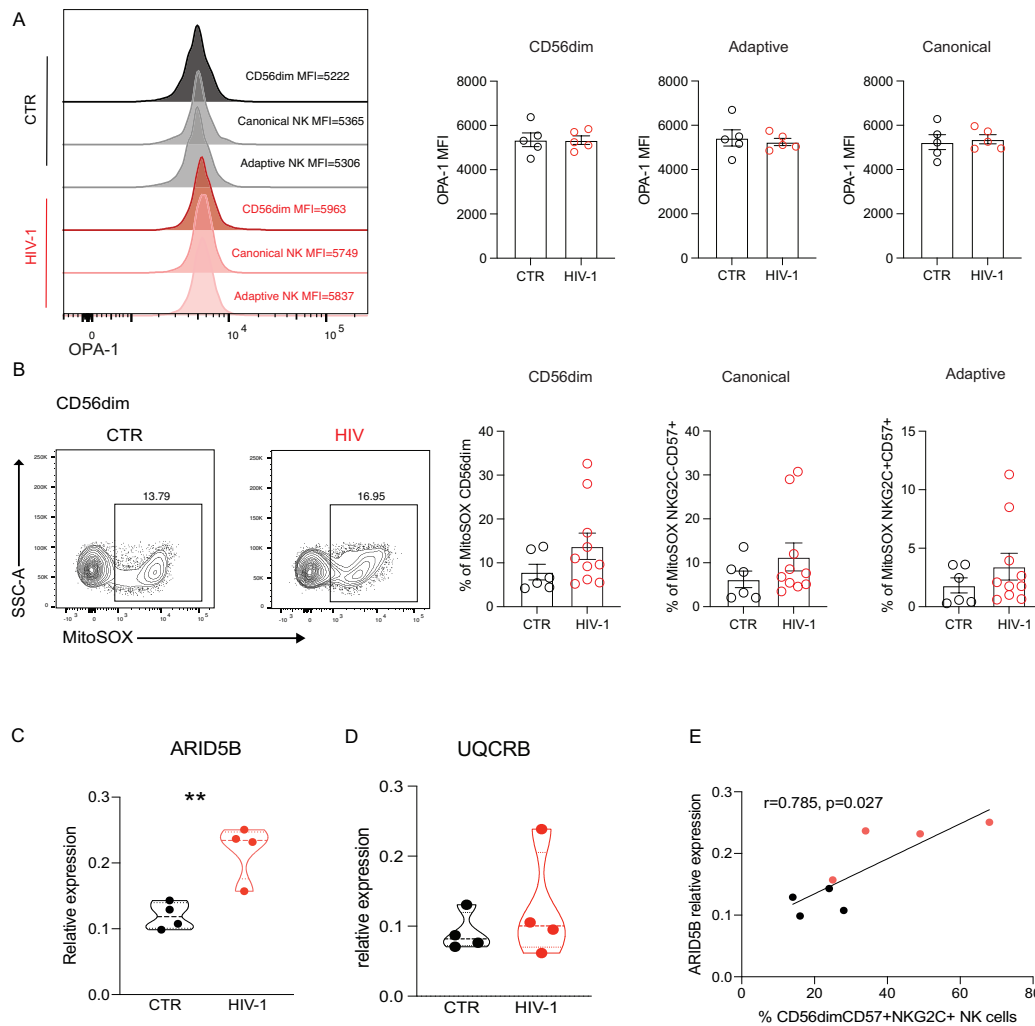

101

102 **(A)** Histogram plots and summary analysis showing the expression levels of OPA-1 in NK cell subsets  
 103 from healthy controls (CTR) and HIV-1 positive patients (HIV-1). **(B)** The percentage of MitoSOX+ cells  
 104 in the NK cell subpopulations. **(C)** *ARID5B* and **(D)** *UQCRB* expressions in isolated NK cells from n=4  
 105 HCMV+ HIV-negative controls and n=4 HIV-1 positive subjects. All relative expression values were  
 106 calculated by normalising against GAPDH as a housekeeping gene. **(E)** Correlation between levels of  
 107 expression of *ARID5B* and *ex vivo* frequencies of adaptive CD57+NKG2C+ NK cells. Significance  
 108 determined by Mann-Whitney U test. The non-parametric Spearman test was used for correlation  
 109 analysis. \*\*p<0.01.

110

111

112

113

114

115

116

117

118

119

120

121 **Supplementary figure 5. Analysis of NK cell membrane health after IL-15 treatment.**

122

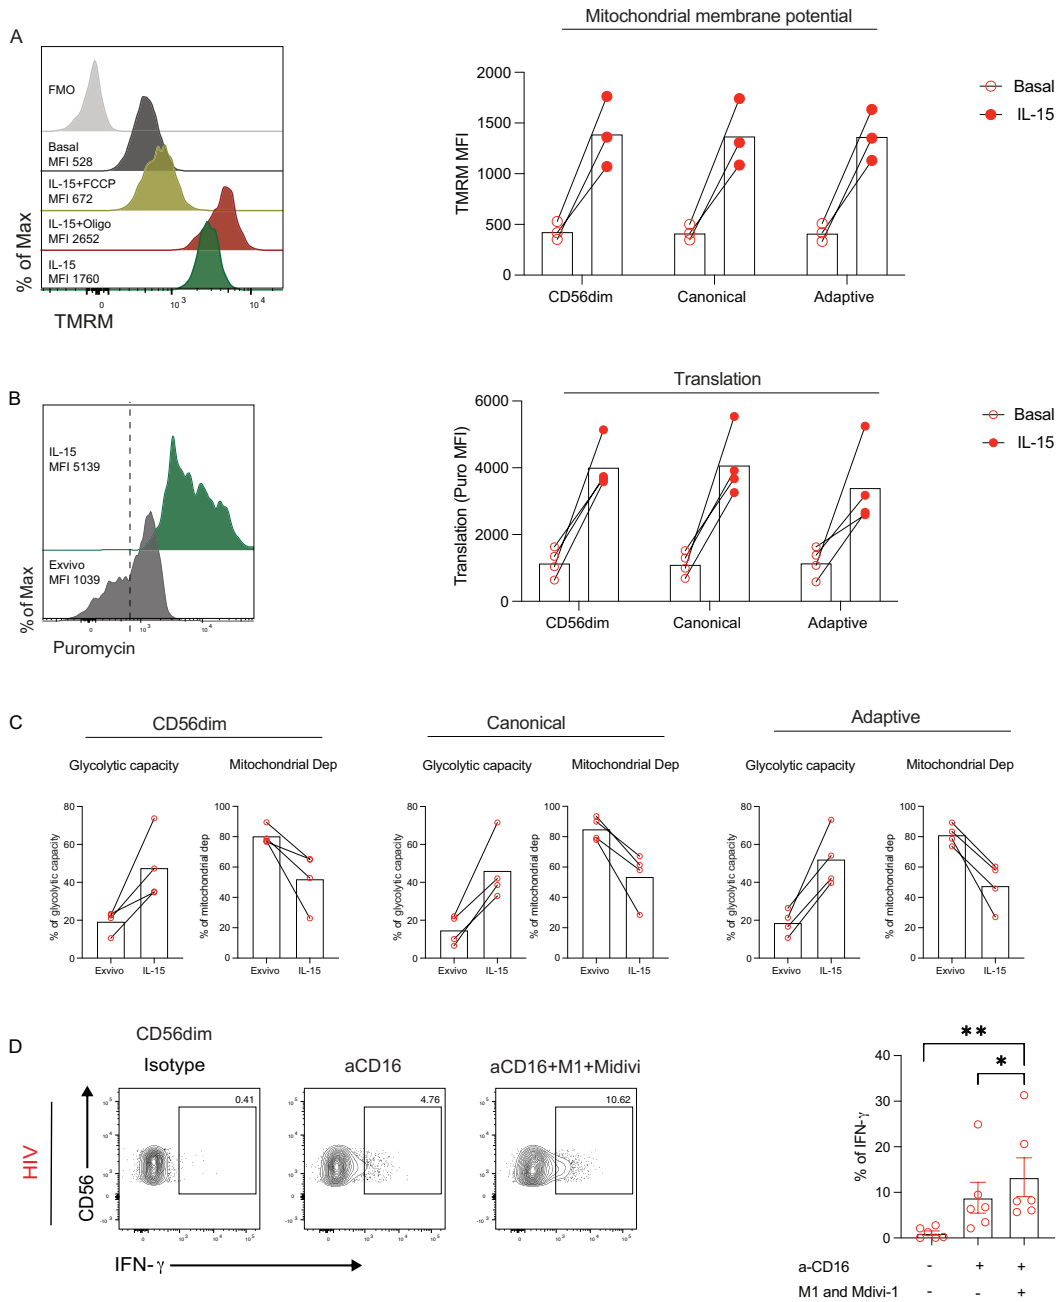

123

124 **(A)** Representative histograms and paired analysis showing TMRM MFI *ex vivo* and following IL-15  
 125 treatment in NK cell subsets from n=3 HIV-1 positive donors. FCCP (negative) and Oligomycin (positive)  
 126 were used as controls for the TMRM measurement. **(B)** Analysis of puromycin levels measured by  
 127 SCENITH *ex vivo* and following IL-15 treatment in NK cells from n=4 HIV-1 positive individuals. **(C)**  
 128 Glycolytic capacity and the mitochondrial dependence in NK cell subsets at basal level and following  
 129 IL-15 treatment. **(D)** IFN- $\gamma$  production by CD56dim NK cells following anti-CD16 stimulation alone or in  
 130 the presence of M1 and Mdivi-1 as indicated. Significance determined by one-way ANOVA with  
 131 multiple comparisons test (D). \*p<0.05.

132

133

134 **Supplementary movie 1. Representative confocal z-stack, 3D projection and reconstruction of**  
135 **mitochondrial distribution in a primary human NK cell isolated from a CMV+ control. Mitochondria,**  
136 **red; cell membrane, green.**

137

138 **Supplementary movie 2. Representative confocal z-stack, 3D projection and reconstruction of**  
139 **mitochondrial distribution in a primary human NK cell isolated from an HIV-1 seropositive**  
140 **donor. Mitochondria, red; cell membrane, green.**

141

142

143
